# Supplementary material
Source: Springer Nature journal article supplement (https://www.springermedizin.de/resource/supplementary/13023_2012_512_MOESM1_ESM.pdf/9642776)
Supplement: MOESM1 [file 9642776]

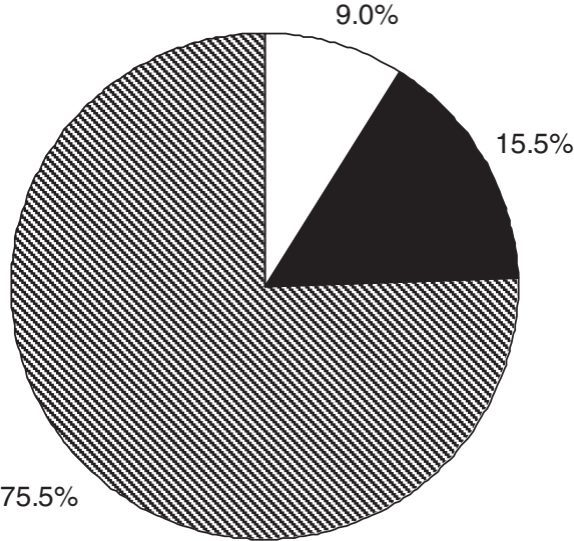

- Normal cognitive development, IQ 85-114
- Borderline/ low-average IQ, IQ 70-84
- ▨ Mild or severe mental retardation, IQ < 69
